# Supplementary material for: Bifunctional Hot Water Vapor Template-Mediated Synthesis of Nanostructured Polymeric Carbon Nitride for Efficient Hydrogen Evolution
Source: MDPI journal article supplement (doi:10.3390/molecules28124862), 2023-06-20
Supplement: s1 [file s1]

## Supplementary Materials

# Bifunctional Hot Water Vapor Template-Mediated Synthesis of Nanostructured Polymeric Carbon Nitride for Efficient Hydrogen Evolution

Baihua Long <sup>1</sup>, Hongmei He <sup>1</sup>, Yang Yu <sup>1</sup>, Wenwen Cai <sup>1</sup>, Quan Gu <sup>2</sup>, Jing Yang <sup>3,\*</sup> and Sugang Meng <sup>4,\*</sup>

<sup>1</sup> College of Material and Chemical Engineering, Pingxiang University, Pingxiang 337055, China

<sup>2</sup> Key Laboratory of Applied Surface and Colloid Chemistry, Ministry of Education, School of Chemistry and Chemical Engineering, Shaanxi Normal University, Xi'an 710062, China

<sup>3</sup> College of Health Science and Environmental Engineering, Shenzhen Technology University, Shenzhen 518118, China

<sup>4</sup> Key Laboratory of Green and Precise Synthetic Chemistry and Applications, Ministry of Education, Huaibei Normal University, Huaibei 235000, China

\* Correspondence: yangjingsztu@163.com (J.Y.); mengsugang@126.com (S.M.); Tel.: +86-18156139968 (S.M.)

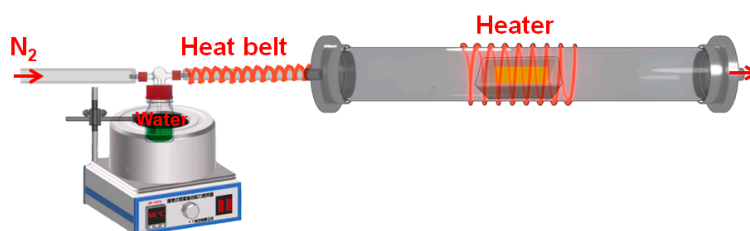

**Scheme S1.** Proposed one-step synthesis of nanostructured PCN by introducing hot water vapor into the polymerization process of C/N precursors.

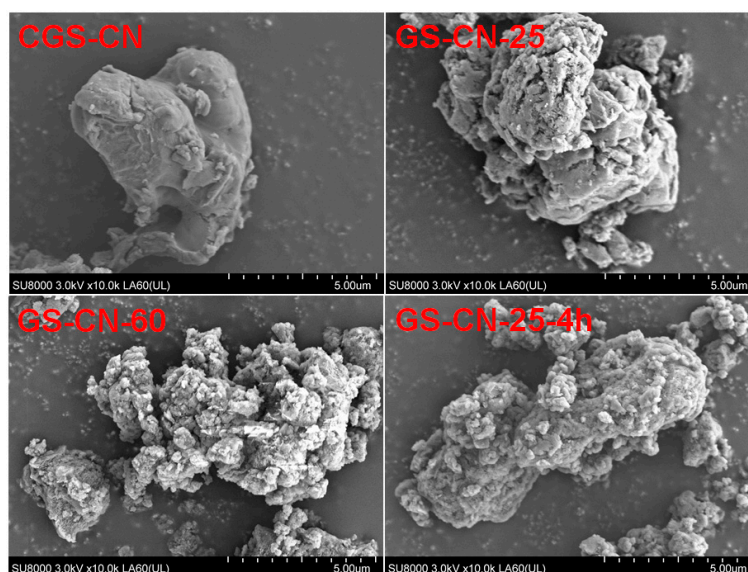

**Figure S1.** SEM images of bulk CGS-CN and GS-CN-x photocatalysts.

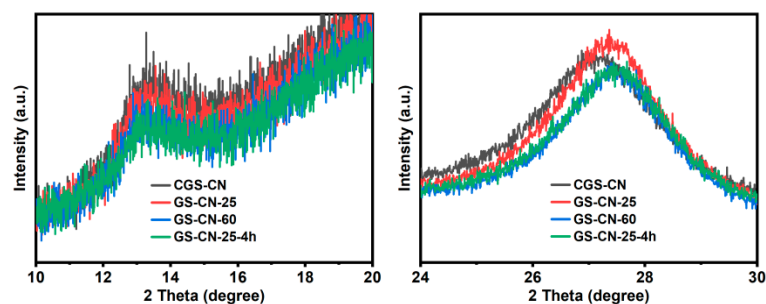

**Figure S2.** The high-magnification section of the XRD patterns for bulk CGS-CN and GS-CN-x photocatalysts.

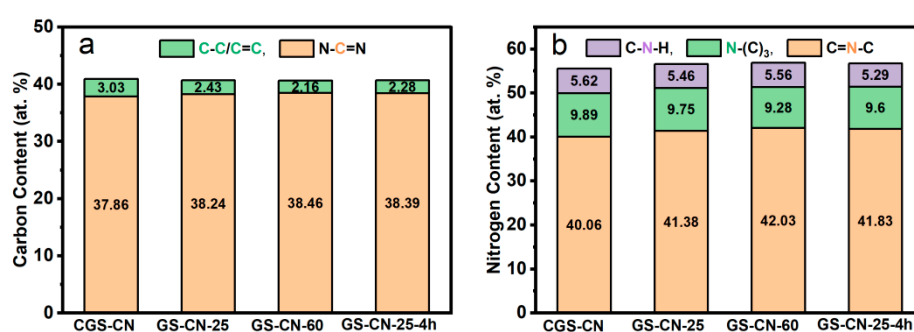

**Figure S3.** Summary of C atomic contents in the various photocatalysts determined by C1s spectra (a) and summary of N atomic contents in the various photocatalysts determined by N1s spectra (b).

Note: the values in the graph are obtained by calculating the percentage of the selected chemical bond's peak area to the corresponding element's total peak area based on XPS analysis results.

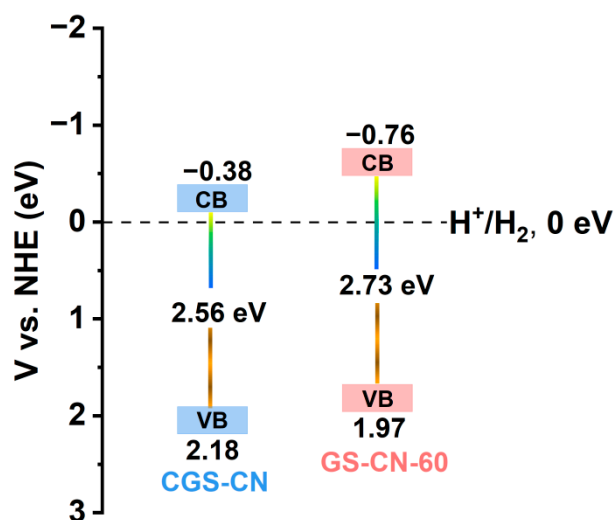

**Figure S4.** The energy band diagrams of bulk CGS-CN and GS-CN-60.

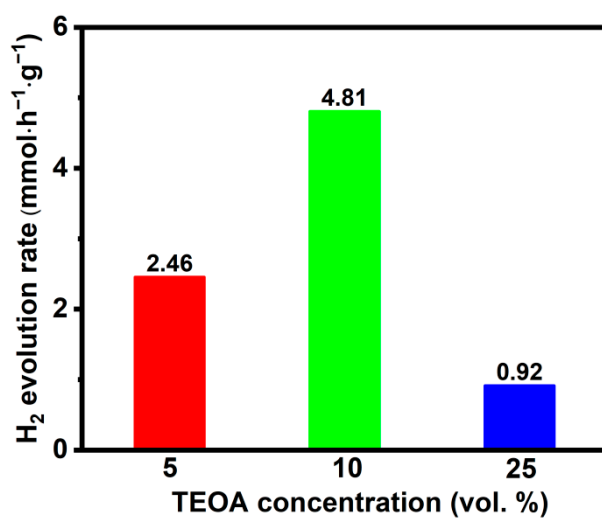

**Figure S5.** H<sub>2</sub> evolution rate from different concentration of TEOA as a sacrificial electron donor by GS-CN-60 photocatalyst.

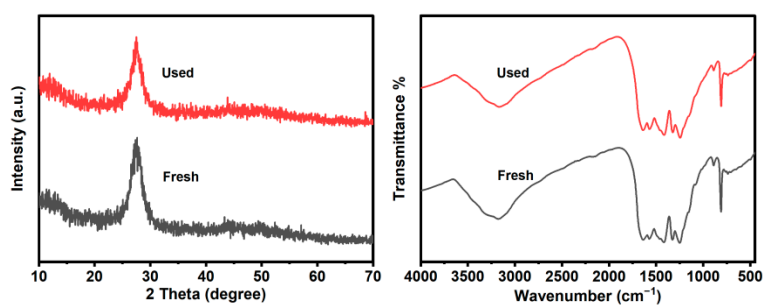

**Figure S6.** XRD and FT-IR patterns of the GS-CN-60 for photocatalytic H<sub>2</sub> evolution before and after five cycling runs.

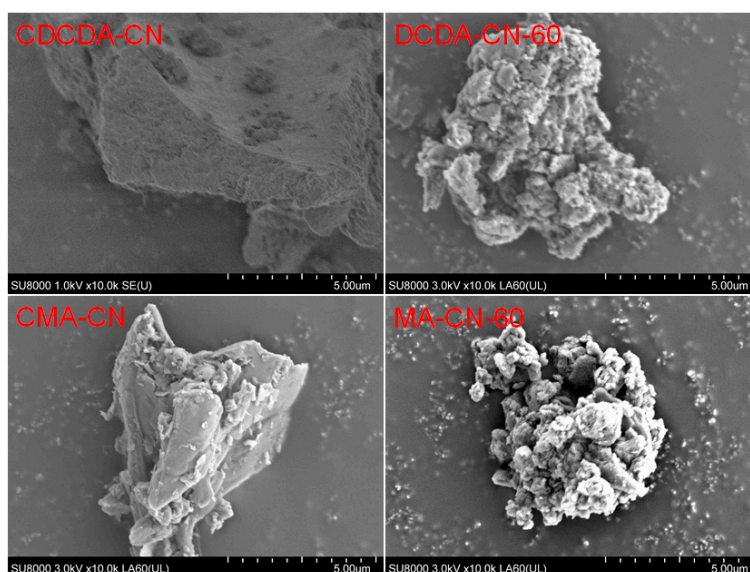

**Figure S7.** SEM images of CDCDA-CN, DCDA-CN-60, CMA-CN, and MA-CN-60.

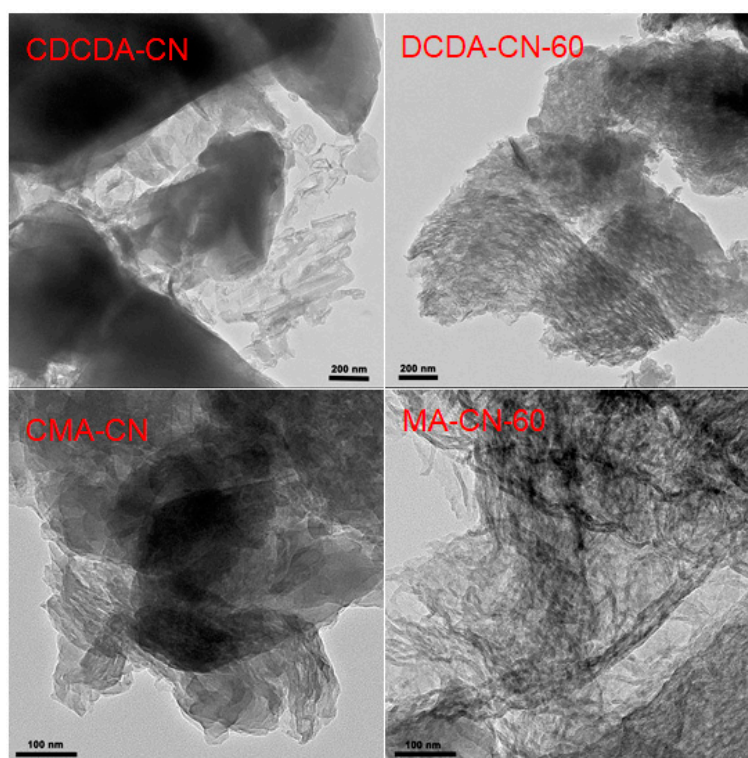

Figure S8. TEM images of CDCDA-CN, DCDA-CN-60, CMA-CN, and MA-CN-60.

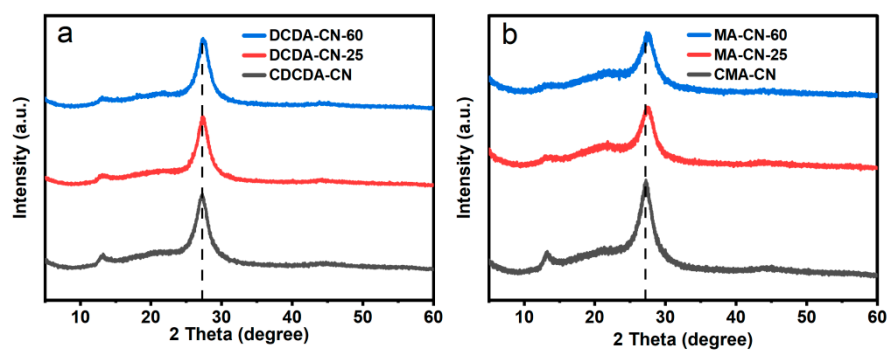

Figure S9. XRD patterns of CDCDA-CN and DCDA-CN-x (a), CMA-CN and MA-CN-x (b).

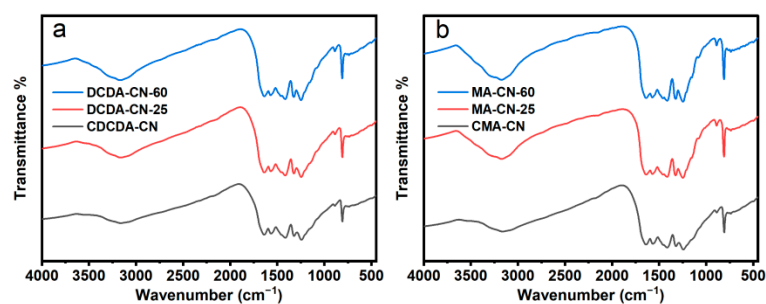

Figure S10. FTIR spectra of CDCDA-CN and DCDA-CN-x (a), CMA-CN and MA-CN-x (b).

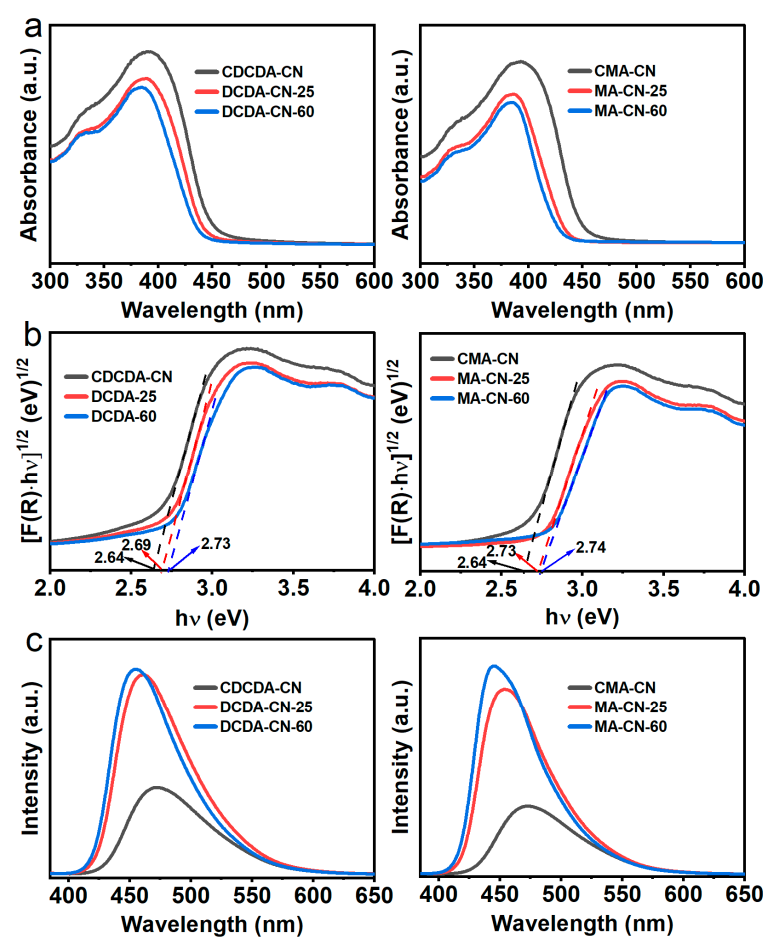

Figure S11. UV-Vis diffuse reflectance spectra (a), the corresponding Kubelka-Munk transformed spectra (b) and PL spectra of CDCDA-CN, DCDA-CN-x, CMA-CN and MA-CN-x (c).

**Table S1.** Surface atomic ratio of all photocatalysts determined by XPS spectra

| Photocatalyst | C (at. %) | N (at. %) | O (at. %) | C/N atomic ratio |
|---------------|-----------|-----------|-----------|------------------|
| CGS-CN        | 40.89     | 55.57     | 3.54      | 0.736            |
| GS-CN-25      | 40.67     | 56.59     | 2.79      | 0.719            |
| GS-CN-60      | 40.62     | 56.87     | 2.46      | 0.714            |
| GS-CN-25-4h   | 40.67     | 56.73     | 2.6       | 0.717            |

**Table S2.** The atom percentage of C, N, O and H atoms in the CGS-CN and GS-CN-60 photocatalysts determined by EA

| Photocatalyst | C (wt. %) | N (wt. %) | O (wt. %) | H (wt. %) | C/N atomic ratio |
|---------------|-----------|-----------|-----------|-----------|------------------|
| CGS-CN        | 33.32     | 57.38     | 7.03      | 2.27      | 0.677            |
| GS-CN-25      | 32.71     | 57.32     | 7.64      | 2.33      | 0.666            |
| GS-CN-60      | 32.15     | 56.50     | 8.92      | 2.43      | 0.664            |
| GS-CN-25-4h   | 31.76     | 55.50     | 10.16     | 2.58      | 0.668            |

**Table S3.** Lifetime and Relative Intensities of the fitting parameters of PL decay curves for CGS-CN and GS-CN-x photocatalysts

| Photocatalyst | $\tau_1$ (ns) | Intensity1 (%) | $\tau_2$ (ns) | Intensity2 (%) | $\tau_{ave}$ (ns) |
|---------------|---------------|----------------|---------------|----------------|-------------------|
| CGS-CN        | 1.75          | 33.62          | 9.18          | 66.38          | 6.68              |
| GS-CN-25      | 1.83          | 35.17          | 8.74          | 64.83          | 6.31              |
| GS-CN-60      | 1.73          | 35.37          | 7.45          | 64.63          | 5.42              |
| GS-CN-25-4h   | 1.76          | 39             | 7.84          | 61             | 5.47              |

**Table S4.** BET specific surface areas ( $S_{BET}$ ) of the photocatalysts

| Photocatalyst | $S_{BET}/m^2 \cdot g^{-1}$ |
|---------------|----------------------------|
| CDCDA-CN      | 9.6                        |
| DCDA-CN-25    | 12.5                       |
| DCDA-CN-60    | 17.1                       |
| CMA-CN        | 0.4                        |
| MA-CN-25      | 20.7                       |
| MA-CN-60      | 36.8                       |
